# Supplementary material for: The effect of GSK-3β in arsenic-induced apoptosis of malignant tumor cells: a systematic review and meta-analysis
Source: Research Square preprint supplement (doi:10.21203/rs.3.rs-200247/v1), 2021-02-24
Supplement: Supplementary file 2 [file 01d3ae811fe5f82cdaa79f5d.xlsx]

## Sheet: in vitro 
in vitro
number	Title				Author		Language	Year	N	AS	GSK-3βsite	AKT site	Outcome indicators		Inhibitor		Cell type			Dose		Time			Index description			Inhibitor description
1	Involvement of glycogen synthase kinase-3β in arsenic trioxide-induced p21 expression				Huang,Huei-Sheng		English	2011	3	ATO	ser9		1、2、3		A、D		A431，HaCaT			20		0.5,1,2,3,4h			1	GSK-3β		A	AKT inhibitor
2	Nerve growth factor prevents arsenic-induced toxicity in PC12 cells through the AKT GSK-3β NFAT pathway				Tan,Zhen		English	2019	3	As2S3	ser9		1、2、3、5、6、7、8、9、10				PC12			0,5,10,15,20		24h			2	AKT		B	AKT agonist
3	Ginsenoside Rb1 inhibits arsenic sulfide-induced neurocyte PC12 toxicity through AKT/GSK-3β/NFAT pathway				Deng, L.J.		Chinese	2019	3	As2S3			1、2、3、5、6、9				PC12			20		24h			3	CAS-3		C	GSK inhibitor
4	Arsenic trioxide potentiates the anti-cancer activities of sorafenib against hepatocellular carcinoma by inhibiting Akt activation				Zhai,B.		English	2015	3	ATO			1、2、3、5				HepG2、HUH7			2		48h			4	CAS-9		D	GSK agonist
5	Arsenic trioxide suppressed mantle cell lymphoma by downregulation of cyclin D1				Lo,Rico K. H.		English	2014	3	ATO	Tyr-216		1、3				Jeko-1、Granta-519、primary MCL			4		2h			5	Bcl-2
6	Inactivation of Akt by arsenic trioxide induces cell death via mitochondrial-mediated apoptotic signaling in SGC-7901 human gastric cancer cells				Gao,Y.H.		English	2014	3	ATO	ser9		1、2、3、4、5、6、8、11		A		SGC-7901			0,1,2,4,8,16		24h			6	Bax
7	Arsenic Trioxide and Sorafenib Induce Synthetic Lethality of FLT3-ITD Acute Myeloid Leukemia Cells				Wang,Rui		English	2018	3	ATO	ser9		1、2、5、6、12、13				MOLM13			0,0.5,1,2,3,4		24h			7	ROS
8	Caspase activation is accelerated by the inhibition of arsenite-induced, membrane rafts-dependent Akt activation				Hossain, K.		English	2003	3	NaAsO2			1				Jurkat cells			100		2			8	Membrane potential		A431	Human skin squamous cell carcinoma
9	Arsenic trioxide inhibits viability and induces apoptosis through reactivating the Wnt inhibitor secreted frizzled related protein-1 in prostate cancer cells				Zheng,Lei		English	2016	3	ATO	ser9		1				lncaP、PC3			0,2.5,5,10		24h			9	Cytochrome C		HepG2	hepatoblastoma
10	IKK-beta NE-kappa B p65 mediates p27(KiP1) protein degradation in arsenite response				Guo,Wei		English	2014	3	NaAsO2			1				MEFs			0,5,10		24h			10	C-MYC		HUH7	Human liver cancer cells
11	Downregulation of Mcl-1 through GSK-3 beta activation contributes to arsenic trioxide-induced apoptosis in acute myeloid leukemia cells				Wang, R.		English	2013	3	ATO	ser9		1、2、5、12、14		A、C		NB4、HL-60			0,0.5,1,2,3		24h			11	PARP		Jeko-1	Lymphoma stem cells
12	GSK3 promotes arsenite-induced apoptosis via facilitation of mitochondria disruption				Watcharasit, Piyajit		English	2008	4	As2S3	ser9		1、2、3、5、6				SH-SY5Y cells			50		24			12	MCL-1		Granta-519	Human gastric adenocarcinoma
13	Mcl-1 gene plays an important role in HHT and ATO to significantly kill HL60 cells co-cultured with bone marrow stromal HS-5 cells				You, P.D		Chinese	2017	3	ATO		ser473	1、2、3、4、5、12				HL-60			8		24h			13	Bak		MOLM13	Human acute myeloid leukemia
14	NDRG2 sensitizes myeloid leukemia to arsenic trioxide via GSK3β-NDRG2-PP2A complex formation				Park,S.		English	2019	3	ATO	ser9		1、2、3、5、6、11、12		C		U937 cells			2		1,2,4			14	GSH
15	Homoharringtonine potentiates the antileukemic activity of arsenic trioxide against acute myeloid leukemia cells				Chen,P.		English	2019	3	ATO			1、12				HL-60、U937			10		24h
16	The suppressive effect of arsenic trioxide on TET2-FOXP3-Lyn-Akt axis-modulated MCL1 expression induces apoptosis in human leukemia cells				Chen, Y. J.		English	2018	3	ATO	ser9		1、2、3、4、5、6、7、8、11、12、13		B		U937			10		24h
17	The effect to IL-3Rα, downstream PI3K Akt signaling of all-trans retinoic acid and arsenic trioxide in NB4 cells				Chen, P.		English	2014	3	ATO			1、2				U937 cells			1		24、48、72
18	Arsenic trioxide-induced p38 MAPK and Akt mediated MCL1 downregulation causes apoptosis of BCR-ABL1-positive leukemia cells				Huang, C. H.		English	2020	3	ATO	ser9	ser473	1、2、3、5、6、7、8、9、12、13		B		K562			10		24h
19	HHT combined with As2O3 can synergistically kill U937 cells co-cultured with bone marrow stromal HS-5 cells and its mechanism				Jin, J		Chinese	2016	3	ATO		ser473	1、2、3、4、5、11、12				U937			8		16h
20
21
22																				0,0.5,1,2,2.5,3,4,5,8,10,15,16,20		0,0.5,1,2,3,4,8,16,24,36,48,72
23																				4		8
24
25
26
27
28
29
30
31
32
33

## Sheet: 1
Involvement of glycogen synthase kinase-3β in arsenic trioxide-induced p21 expression
	As-GSK-3b(A431,0,0.5,1,2,3,4h/20μM)						As-GSK-3b(HaCaT,0,0.5,1,2,3,4h/20μM)
		Mean	SD	N				Mean	SD	N
	0	0.335676	0.00700179	3			0	0.708642	0.0272984	3
	0.5	0.559373	0.0427456	3			0.5	0.832677	0.0284812	3
	1	0.410885	0.0186633	3			1	1.02008	0.0381331	3
	2	0.430951	0.012316	3			2	0.93789	0.0083719	3
	3	0.587183	0.0202963	3			3	0.917538	0.0262469	3
	4	0.685701	0.0106057	3			4	0.787415	0.0406727	3
	As-P-GSK-3b(A431,0,0.5,1,2,3,4h/20μM)						As-P-GSK-3b(HaCaT,0,0.5,1,2,3,4h/20μM)
		Mean	SD	N				Mean	SD	N
	0	0.678741	0.0148461	3			0	0.995005	0.0375776	3
	0.5	0.78249	0.0398564	3			0.5	1.40763	0.0310474	3
	1	0.896124	0.047776	3			1	1.36504	0.0531786	3
	2	0.883278	0.0218235	3			2	1.47222	0.0335117	3
	3	0.845356	0.0116571	3			3	1.59884	0.0547489	3
	4	1.063	0.0119815	3			4	1.50679	0.059021	3
	As-P-AKT(A431,4h/0,20μM)						As-cleaved-Caspase3(A431,4h/0,20μM)							As-P-AKT(A431,4h/0,20μM)				mean	sd		As-cleaved-Caspase3(A431,4h/0,20μM)				mean	sd
		Mean	SD	N				Mean	SD	N				0	0.850731	0.791958	0.817314	0.820001	0.0294788		0	0.255843	0.269372	0.272143	0.265786	0.00872193
	Control	0.820001	0.0294788	3			Control	0.265786	0.00872193	3				20	1.09066	1.12249	1.13738	1.11684	0.0238685		20	0.920779	0.885438	0.890254	0.898823	0.019166
	ATO	1.11684	0.0238685	3			ATO	0.898823	0.019166	3
														As-AKT(A431,4h/0,20μM)				mean	sd
	As-AKT(A431,4h/0,20μM)													0	0.934526	0.911498	0.942537	0.929521	0.0161137
		Mean	SD	N										20	0.912107	0.933034	0.936679	0.927273	0.0132601
	Control	0.929521	0.0161137	3
	ATO	0.927273	0.0132601	3
	AKT inhibitor
Ser9	As-P-GSK-3β(A431,4h/0,20μM，as，as+ly)													As-P-GSK-3β(A431,4h/0,20μM，as，as+ly)				mean	sd
		Mean	SD	N										AS	1.26792	1.27115	1.2835	1.27419	0.00822496
	AS	1.27419	0.00822496	3										AS+LY	1.2581	1.27854	1.23942	1.25869	0.0195675
	AS+LY	1.25869	0.0195675	3
	GSK agonist
	As-cleaved-Caspase3(A431,4h/0,20μM,AS,AS+GSKCA)													As-cleaved-Caspase3(A431,4h/0,20μM,AS,AS+GSKCA)				mean	sd
		Mean	SD	N										AS	0.920106	0.937551	0.949854	0.935837	0.0149479
	AS	0.935837	0.0149479	3										AS+GSKCA	0.668841	0.700658	0.649567	0.673022	0.0258007
	AS+GSKCA	0.673022	0.0258007	3

## Sheet: 2
Nerve growth factor prevents arsenic-induced toxicity in PC12 cells through the AKT/GSK-3β/NFAT pathway
	As-GSK-3b(PC12,24h/0,5,10,15,20μM)			ser9			As-P-GSK-3b(PC12,24h/0,5,10,15,20μM)
		Mean	SD	N				Mean	SD	N
	0	1.09648	0.0315846	3			0	1.11565	0.0176236	3
	5	1.00951	0.0291098	3			5	0.976882	0.0266461	3
	10	0.979955	0.00969725	3			10	0.875452	0.00696452	3
	15	1.06165	0.0203315	3			15	0.91568	0.0124796	3
	20	1.00536	0.0480503	3			20	0.790433	0.0375828	3
	As-AKT(PC12,24h/0,5,10,15,20μM)						As-P-AKT(PC12,24h/0,5,10,15,20μM)
		Mean	SD	N				Mean	SD	N
	0	0.988465	0.0276294	3			0	0.871733	0.0177354	3
	5	0.991959	0.0246914	3			5	0.797092	0.0124789	3
	10	1.20005	0.0235991	3			10	0.951609	0.0174131	3
	15	0.995402	0.0119078	3			15	0.867127	0.0362021	3
	20	1.11384	0.0409313	3			20	0.717839	0.0288143	3
	As-c-Myc(PC12,24h/0,5,10,15,20μM)						As-Bcl-2(PC12,24h/0,5,10,15,20μM)					As-Bax(PC12,24h/0,5,10,15,20μM)					As-Cas-3(PC12,24h/0,5,10,15,20μM)					As-cleaved-Cas-3(PC12,24h/0,5,10,15,20μM)
		Mean	SD	N				Mean	SD	N			Mean	SD	N			mean	sd	N			mean	sd	N
	0	0.947753	0.029969	3			0	0.685589	0.00303223	3		0	0.594328	0.0176165	3		0	0.997757	0.0186918	3		0	0.174987	0.00932854	3
	5	0.990468	0.027883	3			5	0.853431	0.0196402	3		5	0.881908	0.0269802	3		5	0.606132	0.0214336	3		5	0.268226	0.00227041	3
	10	0.781092	0.01751	3			10	0.753105	0.0121402	3		10	0.986895	0.0200906	3		10	0.47718	0.0131154	3		10	0.297556	0.00904328	3
	15	0.657728	0.00581607	3			15	0.711026	0.0243342	3		15	1.05107	0.038896	3		15	0.60156	0.00246356	3		15	0.730984	0.0287171	3
	20	0.524457	0.0160479	3			20	0.34836	0.0161686	3		20	1.06606	0.0298471	3		20	0.354851	0.0162107	3		20	0.887933	0.0397459	3
	As-Mito CytC(PC12,24h/0,20μM)						As-Cyto CytC(PC12,24h/0,20μM)
		Mean	SD	N				Mean	SD	N
	0	1.18519	0.0545671	3			0	0.667259	0.018801	3
	20	0.742542	0.00653779	3			20	0.810575	0.000229986	3
	As-Membrane potential(PC12,24h/0,20μM)
		Mean	SD	N
	0	8.82747	1.84123	3
	20	62.9975	3.1895	3
	AS-ROS(PC12,24h/0,5,10,15,20μM)						As-Membrane potential(PC12,24h/0,5,10,15,20μM)
		Mean	SD	N				Mean	SD	N
	0	9.86301	1.70469	3			0	8.55527	2.26793	3
	5	14.7336	2.3136	3			5	13.4747	2.8062	3
	10	31.9026	3.7747	3			10	22.5437	2.4058	3
	15	51.9939	4.0183	3			15	46.5967	3.6096	3
	20	55.8904	4.0183	3			20	63.1595	2.6723	3

## Sheet: 3
Ginsenoside Rb1 inhibits arsenic sulfide-induced neurocyte PC12 toxicity through AKT/GSK-3β/NFAT pathway
	As-P-GSK-3b(PC12,24h/0,20μM)
		Mean	SD	N
	0	1.11455	0.0468543	3
	20	0.729131	0.0117176	3
	As-P-AKT(PC12,24h/0,20μM)
		Mean	SD	N
	0	1.047	0.0191867	3
	20	0.597043	0.014213	3
	As-Cyt C(PC12,24h/0,20μM)						As-Bcl-2(PC12,24h/0,20μM)					As-Bax(PC12,24h/0,20μM)					As-Caspase-3(PC12,24h/0,20μM)					As-clear-Caspase-3(PC12,24h/0,20μM)
		Mean	SD	N				Mean	SD	N			Mean	SD	N			mean	sd	n			mean	sd	n
	0	0.368302	0.00962762	3			0	0.877943	0.0324753	3		0	0.873019	0.00849374	3		0	0.527419	0.0110016	3		0	0.862227	0.00651548	3
	20	0.977863	0.0115765	3			20	0.469815	0.0035153	3		20	1.04722	0.0124079	3		20	1.00327	0.0342282	3		20	0.710976	0.00297629	3

## Sheet: 4
Arsenic trioxide potentiates the anti-cancer activities of sorafenib against hepatocellular carcinoma by inhibiting Akt activation
in vitro
											HUH7	As-GSK-3b(HUH7,48h/0,2μM)					As-P-GSK-3b(HUH7,48h/0,2μM)
													Mean	SD	N			Mean	SD	N
												0	1.02958	0.0211066	3		0	0.974249	0.0216584	3
												2	1.03845	0.010926	3		2	0.773596	0.000462984	3
HepG2	As-P-AKT(HepG2,48h/0,1,2,4μM)					As-AKT(HepG2,48h/0,1,2,4μM)					HUH7	As-P-AKT(Huh7,48h/0,1,2,4μM)					As-AKT(Huh7,48h/0,1,2,4μM)
		Mean	SD	N			Mean	SD	N				Mean	SD	N			Mean	SD	N
	0	0.784271	0.00527744	3		0	1.04981	0.0110898	3			0	0.861081	0.0267133	3		0	1.00503	0.0297055	3
	1	0.76185	0.00995381	3		1	1.02389	0.027792	3			1	0.915384	0.0039087	3		1	1.04613	0.0179445	3
	2	0.686654	0.00651007	3		2	0.987379	0.0037866	3			2	0.786862	0.00184442	3		2	1.02804	0.00894831	3
	4	0.685001	0.00595083	3		4	0.998209	0.0127252	3			4	0.730389	0.00357647	3		4	1.03468	0.0161865	3
	As-pro-caspase-3(HepG2,48h/0,1,2,4μM)											As-pro-caspase-3(Huh7,48h/0,1,2,4μM)
		Mean	SD	N									Mean	SD	N
	0	0.904589	0.0155871	3								0	0.984218	0.0196219	3
	1	0.76207	0.0162395	3								1	0.902209	0.0114884	3
	2	0.742898	0.0023468	3								2	0.827772	0.00819331	3
	4	0.658258	0.00516454	3								4	0.65223	0.00248017	3
												As-pro-caspase-3(Huh7,48h/0,2μM)					As-Bcl-2(Huh7,48h/0,2μM)					As-Bcl-xl(Huh7,48h/0,2μM)
													Mean	SD	N			Mean	SD	N			Mean	SD	N
												0	0.983171	0.0241639	3		0	1.03409	0.00920937	3		0	0.87218	0.0248472	3
												2	0.911916	0.0104024	3		2	0.843138	0.00978193	3		2	0.992437	0.00488028	3

## Sheet: 5
Arsenic trioxide suppressed mantle cell lymphoma by downregulation of cyclin D1
	As-GSK-3b(Jeko-1,2h/0,4μM)				tyrosine-216			As-P-GSK-3b(Jeko-1,2h/0,4μM)
		Mean	SD	n					Mean	SD	n
	Control	1.4718	0.0110294	3				Control	1.01218	0.0467992	3
	ATO	1.49747	0.046376	3				ATO	1.93266	0.070295	3
Jeko-1														Granta-519
	As-caspase-3(Jeko-1,0,0.5,1,2,4,8h/4μM)							As-cleaver-caspase-3(Jeko-1,0,0.5,1,2,4,8h/4μM)							As-caspase-3(Granta-519 cells,0,0.5,1,2,4,8h/4μM)						As-cleaver-caspase-3(Granta-519 cells,0,0.5,1,2,4,8h/4μM)
		Mean	SD	N					Mean	SD	N					Mean	SD	N				Mean	SD	N
	0	1.1752	0.0125662	3				0	0.241885	0.00309688	3				0	1.05215	0.0201722	3			0	0.186945	0.00495152	3
	0.5	1.24007	0.0649775	3				0.5	0.234189	0.00937611	3				0.5	1.06721	0.0389429	3			0.5	0.185123	0.00895578	3
	1	1.26738	0.0573521	3				1	0.228247	0.00628204	3				1	1.13633	0.0235145	3			1	0.173336	0.00330444	3
	2	1.15438	0.0141191	3				2	0.220636	0.00426912	3				2	1.05182	0.0434593	3			2	0.142646	0.000370911	3
	4	0.830509	0.0184334	3				4	0.866071	0.0115938	3				4	1.0028	0.0652912	3			4	0.298528	0.0135384	3
	8	0.759907	0.0231719	3				8	0.817919	0.0626747	3				8	0.926624	0.0287919	3			8	0.333035	0.00593327	3
Eight primary MCL patient samples
	As-Caspase-3 (primary MCL,4h/0,0.5,1,2,4,8μM)						As-clear-Caspase-3 (primary MCL,4h/0,0.5,1,2,4,8μM)
		Mean	SD	N				Mean	SD	N
	0	1.36819	0.0383316	3			0	0.351751	0.0153291	3
	0.5	1.30981	0.0505118	3			0.5	0.341544	0.0152453	3
	1	1.32349	0.0713727	3			1	0.346371	0.0154567	3
	2	1.31244	0.0116134	3			2	0.358438	0.00657143	3
	4	1.28569	0.0569275	3			4	0.926583	0.0652561	3
	8	0.941999	0.035686	3			8	0.781711	0.039045	3

## Sheet: 6
Inactivation of Akt by arsenic trioxide induces cell death via mitochondrial-mediated apoptotic signaling in SGC-7901 human gastric cancer cells
	As-GSK-3β( SGC-7901,24h/0,1，2,4,8,16μM)
(Ser9)		Mean	SD	N
	0	1.13757	0.0407745	3
	1	0.833465	0.0287043	3
	2	0.526279	0.0126375	3
	4	0.389924	0.0213601	3
	8	0.375658	0.0151585	3
	16	0.30544	0.00478931	3
	As-AKT( SGC-7901,24h/0,1,2,4,8,16μM)				Ser473	As-P-AKT( SGC-7901,24h/0,1,2,4,8,16μM)				Thr308	As-P-AKT( SGC-7901,24h/0,1,2,4,8,16μM)
		Mean	SD	N			Mean	SD	N			Mean	SD	N
	0	0.542813	0.0155691	3		0	0.55945	0.0216011	3		0	0.977582	0.0251331	3
	1	0.513401	0.0189885	3		1	0.470146	0.0175482	3		1	0.590496	0.0133044	3
	2	0.429268	0.0101863	3		2	0.474461	0.0226613	3		2	0.553713	0.0343441	3
	4	0.426164	0.00800806	3		4	0.262197	0.0118202	3		4	0.242	0.0085004	3
	8	0.425479	0.0139329	3		8	0.142972	0.0128771	3		8	0.241094	0.0208899	3
	16	0.426919	0.0281416	3		16	0.164605	0.00156674	3		16	0.144706	0.00535481	3
	As-Bcl-2( SGC-7901,24h/0,1,2,4,8,16μM)					As-Bax( SGC-7901,24h/0,1,2,4,8,16μM)					As-pro-Caspase9( SGC-7901,24h/0,1,2,4,8,16μM)					As-cleaved-Caspase9( SGC-7901,24h/0,1,2,4,8,16μM)					As-pro-Caspase3( SGC-7901,24h/0,1,2,4,8,16μM)					As-cleaved-Caspase3( SGC-7901,24h/0,1,2,4,8,16μM)
		Mean	SD	N			Mean	SD	N			Mean	SD	N			Mean	SD	N			Mean	SD	N			Mean	SD	N
	0	1.07247	0.0487741	3		0	0.274007	0.0142237	3		0	1.70138	0.141168	3		0	0.628351	0.03182	3		0	1.36036	0.0205802	3		0	0.441766	0.0209559	3
	1	1.325	0.0470096	3		1	0.406277	0.0152875	3		1	1.82905	0.0302325	3		1	1.00314	0.0424502	3		1	1.42399	0.0594612	3		1	0.491771	0.0211102	3
	2	1.21693	0.092031	3		2	0.867126	0.0679474	3		2	1.77698	0.149643	3		2	0.94431	0.0731267	3		2	0.816083	0.0391483	3		2	0.487997	0.0300134	3
	4	1.10151	0.0357255	3		4	0.540851	0.041928	3		4	0.936453	0.0328319	3		4	1.0053	0.0335089	3		4	0.583236	0.00284904	3		4	0.450574	0.0176449	3
	8	1.19315	0.028991	3		8	1.02011	0.0310146	3		8	0.494285	0.0266975	3		8	1.46724	0.0100795	3		8	0.669608	0.0225945	3		8	0.80296	0.00360458	3
	16	1.05753	0.0368532	3		16	1.31873	0.028248	3		16	0.501913	0.02904	3		16	1.77578	0.0243048	3		16	0.917684	0.0291521	3		16	0.683485	0.030567	3
	As-Bcl-2( SGC-7901,24h/0,2μM)
		Mean	SD	N
	0	1.06029	0.0262311	3
	2	0.932389	0.0274263	3
	As-PARP( SGC-7901,24h/0,1,2,4,8,16μM)					As-cleaved-PARP( SGC-7901,24h/0,1,2,4,8,16μM)
		Mean	SD	N			Mean	SD	N
	0	1.68742	0.125961	3		0	0.468447	0.0163676	3
	1	1.49931	0.0330493	3		1	1.12168	0.0433841	3
	2	1.42969	0.130206	3		2	1.50298	0.0947394	3
	4	0.874167	0.0734494	3		4	2.08792	0.0787234	3
	8	0.84765	0.0269939	3		8	2.15604	0.0538092	3
	16	0.624213	0.0410922	3		16	1.74957	0.0327951	3
	Mitochondrial membrane potential( SGC-7901,24h/0,1,2,4,8,16μM)
		Mean	SD	N
	0	3.21186	0.89001	3
	1	11.2664	1.8813	3
	2	13.5217	1.5344	3
	4	17.0653	1.9308	3
	8	27.5481	1.3364	3
	16	35.3056	1.9315	3
PI3K inhibitor
	As-Bcl-2(SGC-7901,24h/0,16μM,as,as+ly)					As-Bax( SGC-7901,24h/0,16μM,as,as+ly)					As-pro-Caspase3(SGC-7901,24h/0,16μM,as,as+ly)					As-cleaved-Caspase3(SGC-7901,24h/0,16μM,as,as+ly)					As-pro-Caspase9(SGC-7901,24h/0,16μM,as,as+ly)					As-cleaved-Caspase9(SGC-7901,24h/0,16μM,as,as+ly)
		Mean	SD	N			Mean	SD	N			Mean	SD	N			Mean	SD	N			Mean	SD	N			Mean	SD	N
	AS	1.30364	0.024258	3		AS	1.17374	0.00444054	3		AS	1.00692	0.00729839	3		AS	1.09604	0.0358848	3		AS	1.17019	0.0164336	3		AS	0.96573	0.00712711	3
	AS+LY	1.01395	0.00966582	3		AS+LY	1.3432	0.0140497	3		AS+LY	0.668785	0.010967	3		AS+LY	1.39084	0.0146884	3		AS+LY	0.89286	0.0203005	3		AS+LY	1.08323	0.0234161	3
	As-PARP(SGC-7901,24h/0,16μM,as,as+ly)					As-cleaved-PARP(SGC-7901,24h/0,16μM,as,as+ly)
		Mean	SD	N			Mean	SD	N
	AS	0.484375	0.00905727	3		AS	0.56544	0.0138775	3
	AS+LY	0.408294	0.00824421	3		AS+LY	0.882906	0.0464776	3
	Mitochondrial membrane potential( SGC-7901,24h/0,1,2,4,8,16μM,0,as,as+ly)
		Mean	SD	N
	0	2.86071	0.85781	3
	as	34.8173	1.9967	3
	as+ly	73.572	1.1429	3

## Sheet: 7
Arsenic Trioxide and Sorafenib Induce Synthetic Lethality of FLT3-ITD Acute Myeloid Leukemia Cells
	As-GSK-3b(MOLM13,24h/0,0.5,1,2,3,4μM)					As-P-GSK-3b(MOLM13,24h/0,0.5,1,2,3,4μM)
		Mean	SD	N			Mean	SD	N
	0	1.2632	0.0570179	3		0	0.391595	0.0281416	3
	0.5	1.09782	0.0498101	3		0.5	0.437938	0.0358965	3
	1	1.16511	0.0420668	3		1	0.609402	0.0107982	3
	2	1.24242	0.0228407	3		2	0.727046	0.00639238	3
	3	1.16388	0.0225773	3		3	0.757505	0.0203905	3
	4	1.19403	0.0508503	3		4	0.852778	0.0297066	3
	As-P-AKT(MOML13 cells,24h/0,0.5,1,2,3,4μM)					As-AKT(MOML13 cells,24h/0,0.5,1,2,3,4μM)
		Mean	SD	N			Mean	SD	N
	0	0.91716	0.000733255	3		0	0.658343	0.0157527	3
	0.5	0.749691	0.00756939	3		0.5	0.648831	0.013548	3
	1	0.742833	0.00820863	3		1	0.503793	0.0285868	3
	2	0.673325	0.014839	3		2	0.406907	0.0186707	3
	3	0.688775	0.0181745	3		3	0.327194	0.00761526	3
	4	0.723572	0.0204803	3		4	0.268399	0.00785785	3
	As-MCL-1(MOML13 cells,24h/0,0.5,1,2,3,4μM)					As-Bcl-2(MOML13 cells,24h/0,0.5,1,2,3,4μM)
		Mean	SD	N			Mean	SD	N
	0	0.579809	0.0160871	3		0	0.729598	0.0147698	3
	0.5	0.576931	0.00136399	3		0.5	0.70516	0.0239954	3
	1	0.515358	0.0190944	3		1	0.733748	0.0100937	3
	2	0.40978	0.0222924	3		2	0.783641	0.0165345	3
	3	0.300723	0.023847	3		3	0.752126	0.0093657	3
	4	0.26143	0.00728767	3		4	0.73963	0.0300793	3
	As-MCL-1(MOML13 cells,24h/0,4μM)					As-Bak(MOML13 cells,24h/0,4μM)					As-Bax(MOML13 cells,24h/0,4μM)
		Mean	SD	N			Mean	SD	N			Mean	SD	N
	0	0.729794	0.056944	3		0	0.746383	0.043266	3		0	0.890705	0.0351719	3
	4	0.602876	0.0176497	3		4	0.62369	0.0120527	3		4	0.844654	0.0179108	3

## Sheet: 8
8	Caspase activation is accelerated by the inhibition of arsenite-induced, membrane rafts-dependent Akt activation
	AS-P-GSK-3β(Jurkat cells,2h/0,100μM)
		Mean	SD	N
	0	0.417757	0.013362	3
	50	0.860384	0.0194121	3

## Sheet: 9
Arsenic trioxide inhibits viability and induces apoptosis through reactivating the Wnt inhibitor secreted frizzled related protein-1 in prostate cancer cells
	As-GSK-3b(lncaP,24h/0,2.5,5，10μM)					As-P-GSK-3b(lncaP,24h/0,2.5,5，10μM)
		Mean	SD	N			Mean	SD	N
	0	0.944969	0.0365865	3		0	0.670497	0.0258358	3
	2.5	0.968391	0.0166674	3		2.5	0.893053	0.0212798	3
	5	0.967118	0.0199694	3		5	0.951937	0.0152014	3
	10	1.00279	0.021038	3		10	0.970079	0.0135582	3
	As-GSK-3b(PC3,24h/0,2.5,5，10μM)					As-P-GSK-3b(PC3,24h/0,2.5,5，10μM)
		Mean	SD	N			Mean	SD	N
	0	1.09087	0.0217778	3		0	0.522825	0.00992595	3
	2.5	1.09367	0.0197027	3		2.5	0.699104	0.0211289	3
	5	1.12106	0.00444987	3		5	0.791225	0.0138271	3
	10	1.0974	0.0189592	3		10	0.894782	0.0109436	3

[truncated: 10 more sheets: 10, 11, 12, 13, 14, 15, 16, 17, 18, 19]
